# Supplementary material for: Facile growth of porous Fe2V4O13 films for photoelectrochemical water oxidation
Source: Royal Society of Chemistry journal article supplement (doi:10.1039/c5ta07877f), 2015-11-02
Supplement: c5ta07877f1.pdf [file c5ta07877f1.pdf]

## Supplementary Information for

### Facile Growth of Porous $\text{Fe}_2\text{V}_4\text{O}_{13}$ Films for Photoelectrochemical Water Oxidation

Ding Tang,<sup>ab</sup> Alexander J. E. Rettie,<sup>a</sup> Oluwaniyi Mabayoje,<sup>a</sup> Bryan R. Wygant,<sup>a</sup> Yanqing Lai,<sup>\*b</sup>

Yexiang Liu,<sup>b</sup> and C. Buddie Mullins<sup>\*a</sup>

<sup>a</sup>McKetta Department of Chemical Engineering and Department of Chemistry, University of Texas at Austin, 1 University Station C0400, Austin, Texas 78712-0231, USA. E-mail: mullins@che.utexas.edu; Fax: +1-512-471-7060; Tel: +1-512-471-5817

<sup>b</sup>School of Metallurgy and Environment, Central South University, Changsha 410083, China. E-mail: laiyanningcsu@163.com; Fax: +86 731 88710171; Tel: +86 731 88830649

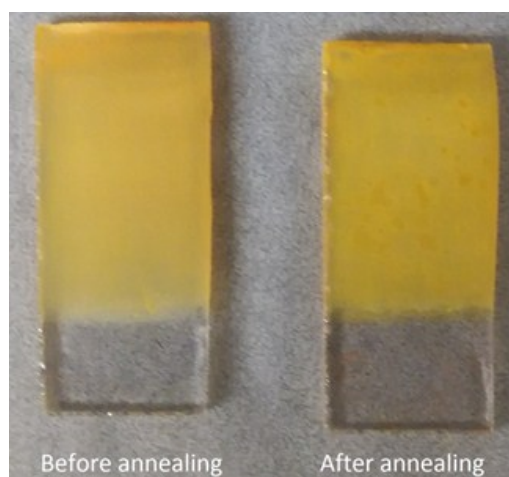

**Fig S1** Digital images of  $\text{Fe}_2\text{V}_4\text{O}_{13}$  films on FTO before and after annealing at 500 °C for 1 h.

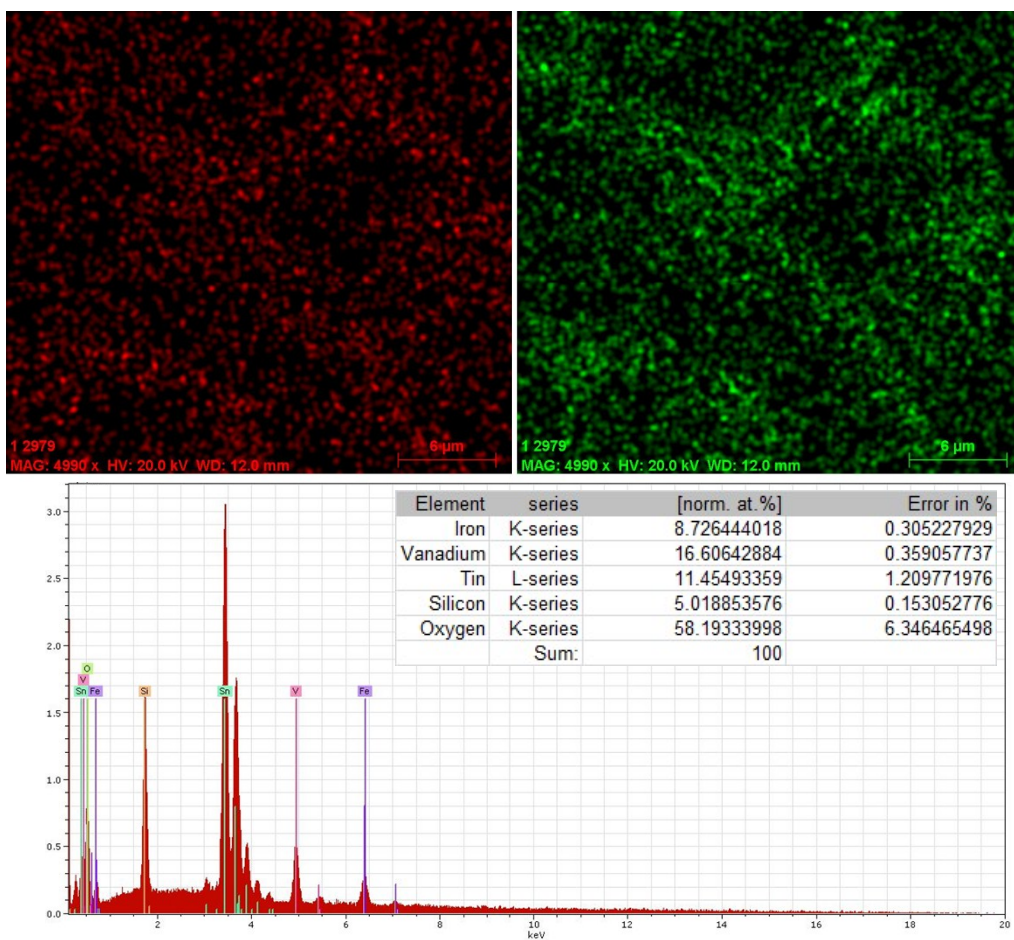

**Fig S2** Elemental mapping with Fe and V color coded and EDS spectrum of as-prepared  $\text{Fe}_2\text{V}_4\text{O}_{13}$  film. The Sn and Si peaks in the EDS spectrum are from the FTO substrate. Insert table shows the EDS elemental results. The atomic ratio of Fe and V approximately equals to 1:2.

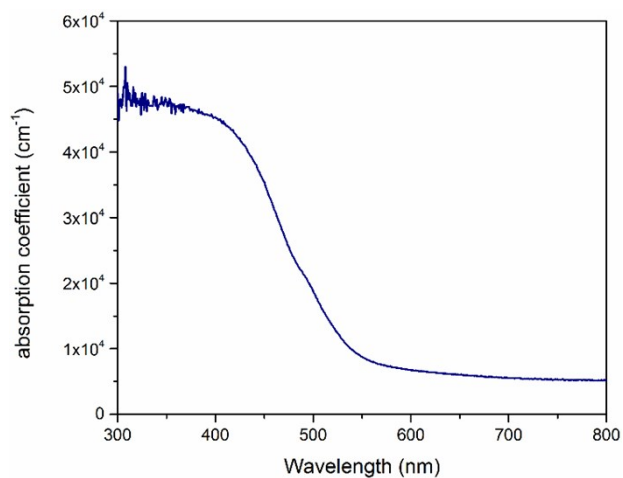

Fig. S3 Absorption coefficient spectra of Fe<sub>2</sub>V<sub>4</sub>O<sub>13</sub> film.

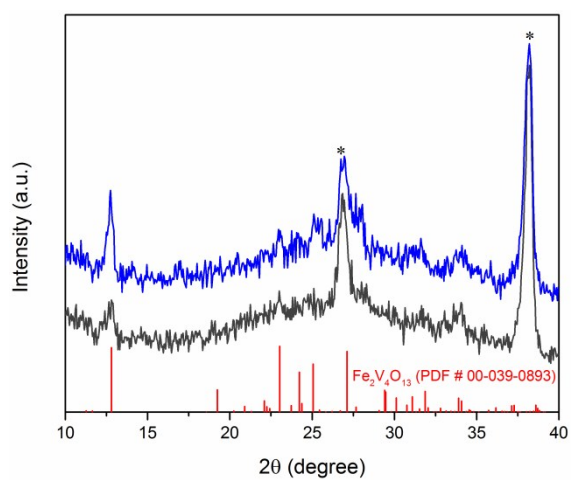

Fig. S4 XRD patterns of Fe<sub>2</sub>V<sub>4</sub>O<sub>13</sub> films annealed at 400 °C for 12 h and 500 °C for 6 h, respectively. Peaks marked (\*) arise from FTO.

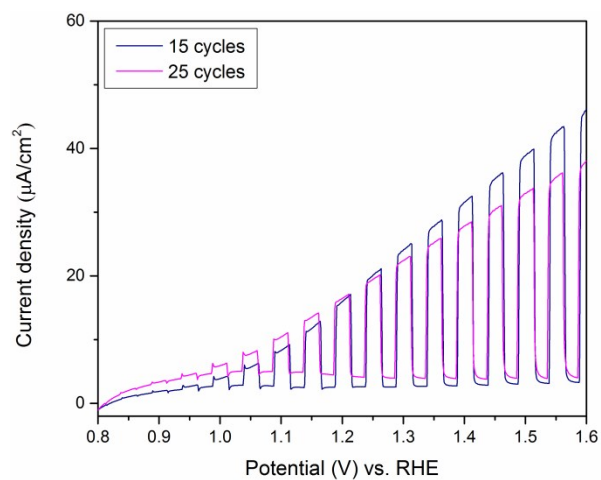

**Fig. S5** Chopped LSVs of  $\text{Fe}_2\text{V}_4\text{O}_{13}$  films with different thicknesses (controlled by number of cycles) annealed at 500 °C for 1 h in 0.1 M sodium borate buffer solution (pH 9.2).

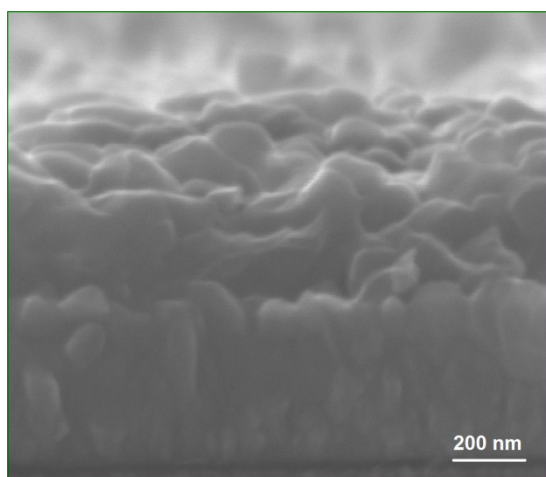

**Fig. S6** Cross-sectional SEM image of  $\text{Fe}_2\text{V}_4\text{O}_{13}$  film obtained by repeating 20 cycles.

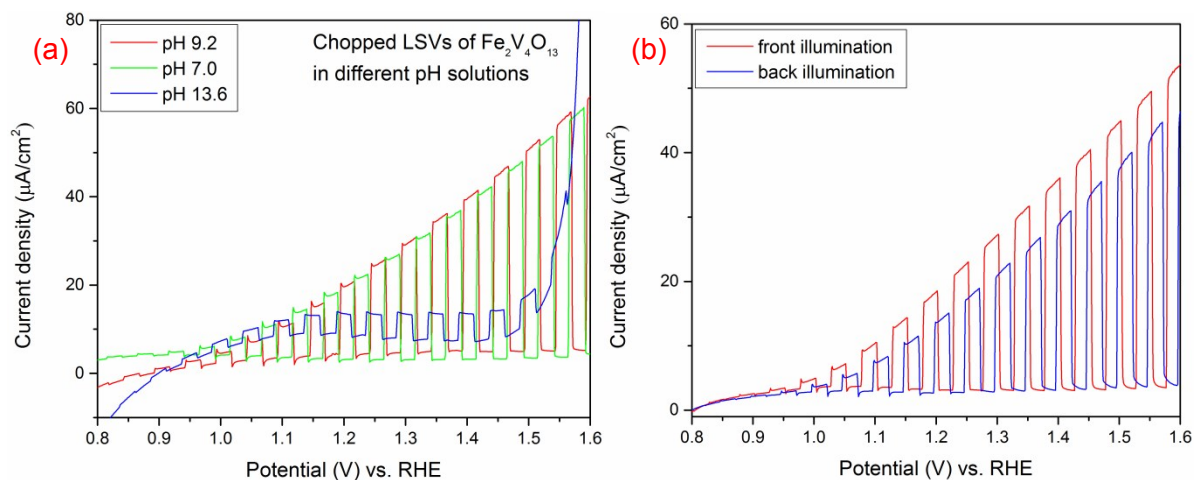

**Fig. S7** (a) Chopped LSVs of  $\text{Fe}_2\text{V}_4\text{O}_{13}$  films in different buffer solution (0.1 M sodium borate buffer solution, pH 9.2; 0.1 M potassium phosphate buffer solution, pH 7.0; 1 M KOH solution, pH 13.6); (b) Chopped LSVs of  $\text{Fe}_2\text{V}_4\text{O}_{13}$  films in 0.1 M sodium borate buffer solution (pH 9.2) with different illumination direction.

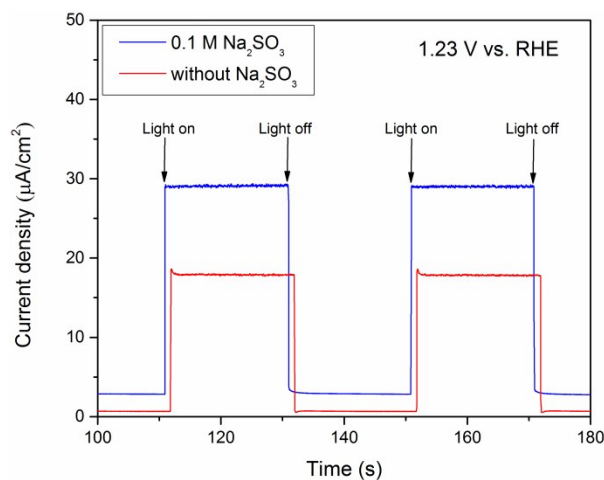

**Fig. S8** Amperometric  $i-t$  curves of  $\text{Fe}_2\text{V}_4\text{O}_{13}$  film under illumination in 0.1 M sodium borate buffer solution with/without 0.1 M  $\text{Na}_2\text{SO}_3$  solution (pH 9.2) at 1.23 V vs. RHE.

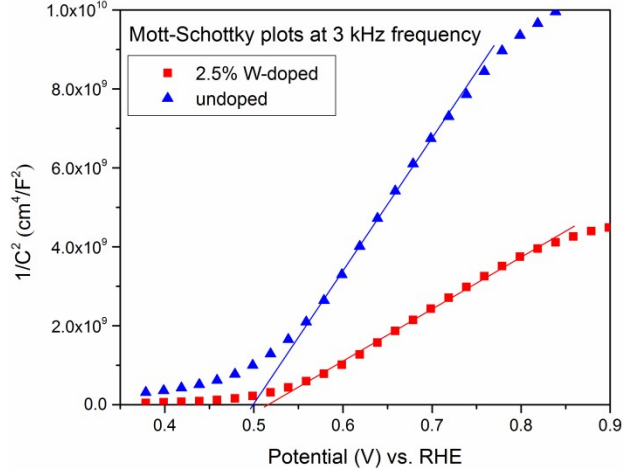

**Fig. S9** Mott-Schottky plots at 3 kHz frequency of undoped and 2.5% W-doped  $\text{Fe}_2\text{V}_4\text{O}_{13}$  films obtained in 0.1 M sodium borate buffer solution (pH 9.2). As shown in the figure, 2.5% W-doped  $\text{Fe}_2\text{V}_4\text{O}_{13}$  film shows a smaller slope compared to undoped films, which indicates the higher carrier density based on the following equation:

$$N_d = (2/e\epsilon\epsilon_0)[d(1/C^2)/dV]^{-1}$$

where  $N_d$  is the concentration of charge carriers,  $e$  is the elemental charge,  $\epsilon$  is the dielectric constant of the material,  $\epsilon_0$  is the permittivity of vacuum,  $C$  is the space charge layer capacitance and  $V$  is the applied potential <sup>1</sup>.

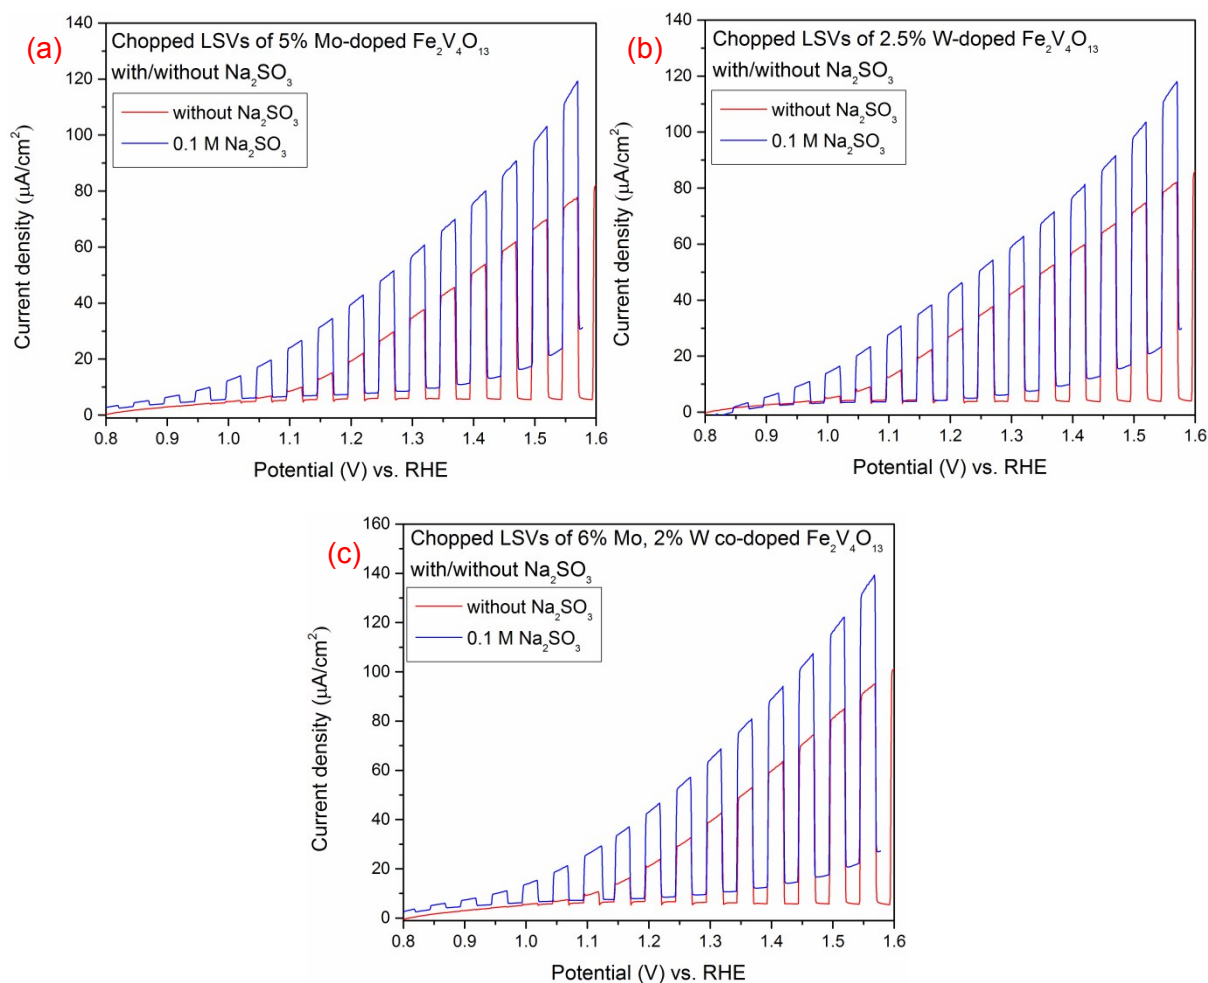

**Fig. S10** Chopped LSVs of doped  $\text{Fe}_2\text{V}_4\text{O}_{13}$  films in 0.1 M sodium borate buffer solution with/without 0.1 M  $\text{Na}_2\text{SO}_3$  (pH 9.2): (a) 5% Mo-doped; (b) 2.5% W-doped; (c) 6% Mo, 2% W co-doped.



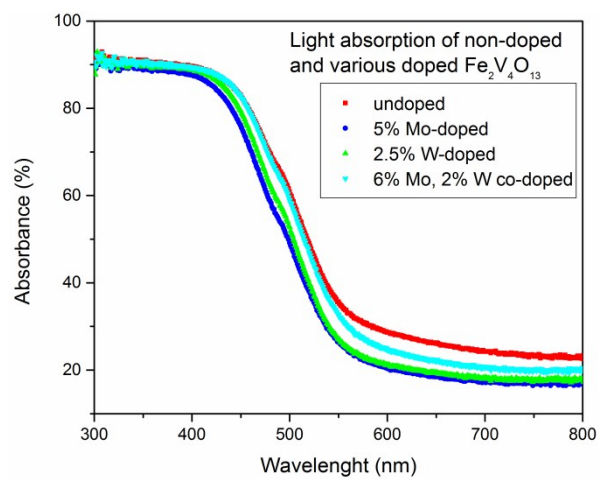

**Fig. S11** Absorbance spectrum of undoped, 5% Mo-doped, 2.5% W-doped and 6% Mo, 2% W co-doped  $\text{Fe}_2\text{V}_4\text{O}_{13}$  films annealed at 500 °C for 1 h.

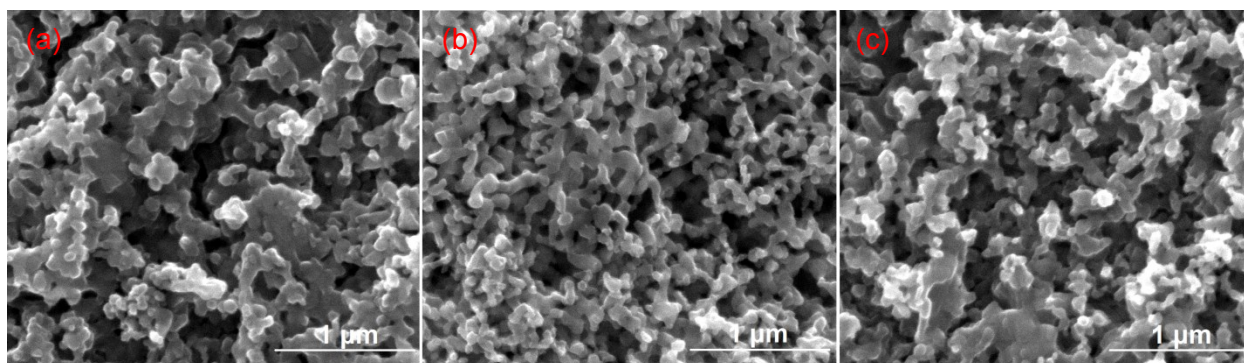

**Fig. S12** SEM images of 5% Mo-doped, 2.5% W-doped and 6% Mo, 2% W co-doped  $\text{Fe}_2\text{V}_4\text{O}_{13}$  films annealed at 500 °C for 1 h.



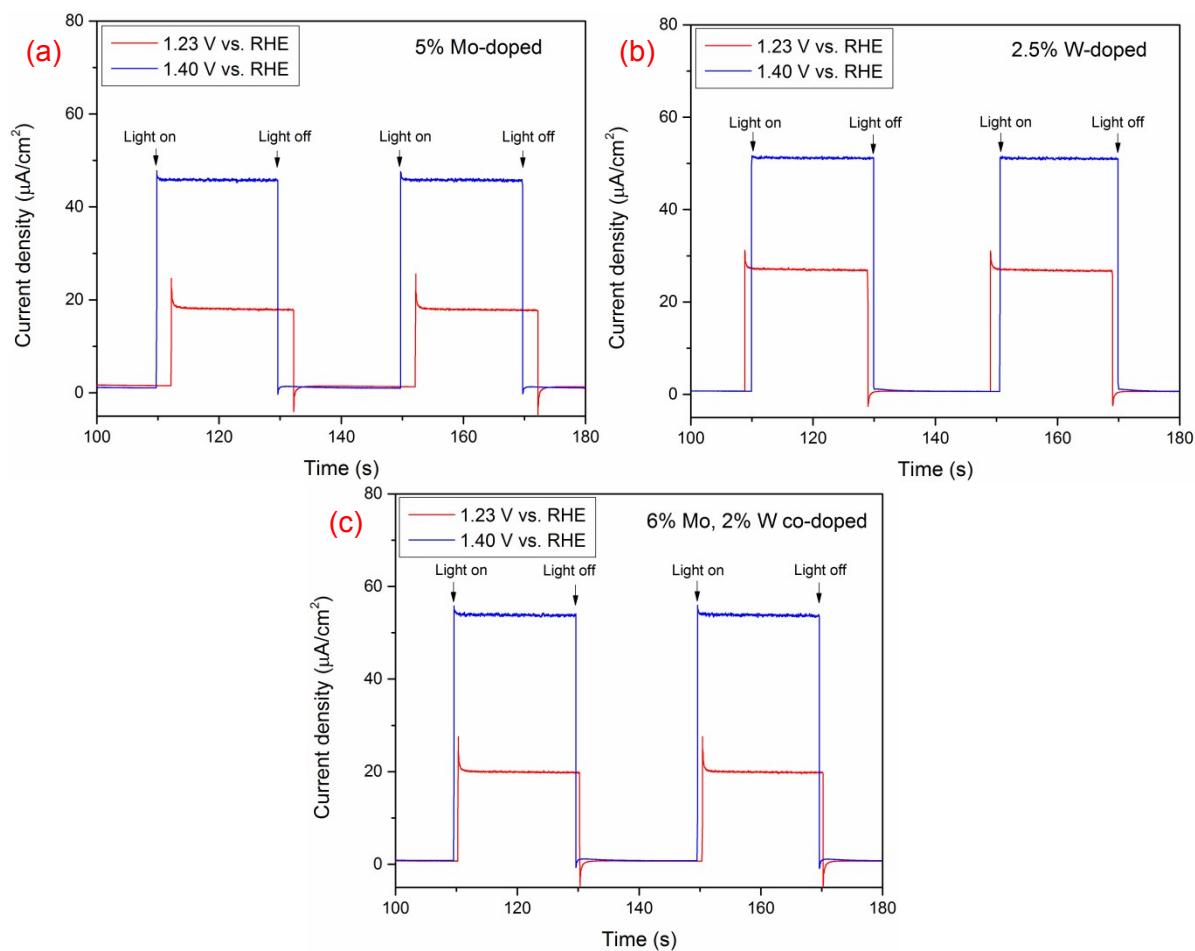

**Fig. S13** Amperometric *i-t* curves of 5% Mo-doped, 2.5% W-doped and 6% Mo, 2% W co-doped  $\text{Fe}_2\text{V}_4\text{O}_{13}$  films under illumination in 0.1 M sodium borate buffer solution (pH 9.2) at an applied potential of 1.23 and 1.40 V vs. RHE.

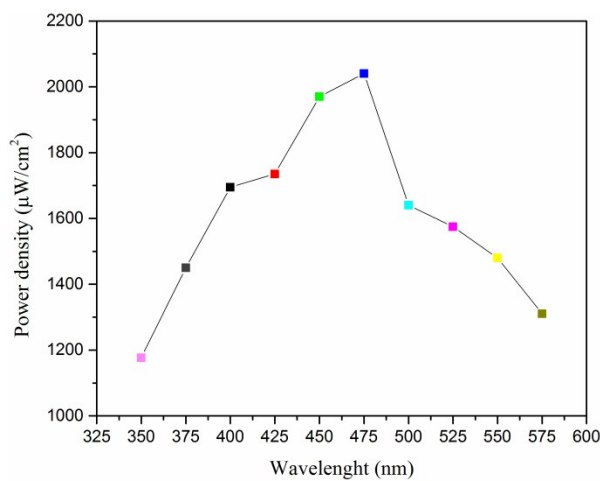

**Fig. S14** Incident light power density spectrum (from 340~575 nm) used for the IPCE measurements.

## References

1. X. H. Lu, G. M. Wang, S. L. Xie, J. Y. Shi, W. Li, Y. X. Tong and Y. Li, *Chem. Commun.*, 2012, **48**, 7717-7719.
